# Supplementary material for: Fanconi anaemia, BRCA2 mutations and childhood cancer: a developmental perspective from clinical and epidemiological observations with implications for genetic counselling
Source: HighWire-hosted journal article supplement (doi:10.1136/jmedgenet-2013-101642), 2013-11-20
Supplement: jmedgenet-2013-101642supp.pdf [file jmedgenet-2013-101642supp.pdf]

| Code    |   | Mutation 1              | Mutation 2                | Clinical features                                                                                                                                                                                         | Age and type of Cancer                                          | Outcome                       | Ref                                         |
|---------|---|-------------------------|---------------------------|-----------------------------------------------------------------------------------------------------------------------------------------------------------------------------------------------------------|-----------------------------------------------------------------|-------------------------------|---------------------------------------------|
| HSC62   | M | IVS19-1 G>A             | IVS19-1 G>A               | Abnormal thumb (limited clinical description)                                                                                                                                                             | None at 30 years                                                | No details reported           | <i>Howlett et al</i>                        |
| EUFA579 | F | 7235G _ A<br>(p.R2336H) | 5837TC _ AG<br>(p.F1807X) | Pigmented, abnormal thumb (limited clinical description*)                                                                                                                                                 | AML, 2 years                                                    | No details reported           | <i>Howlett et al</i>                        |
| EUFA423 | F | 7691/insAT<br>[R2488fs] | 9900/insA                 | Pigmented, abnormal thumb, bone marrow failure (limited clinical description)                                                                                                                             | Brain, 3 years                                                  | No details reported           | <i>Howlett et al</i>                        |
| AP37P   | M | 8415G RT<br>K2729N      | 8732C RA<br>[S2835X]      | Short, pigmented, cafe´ au lait, abnormal thumb, Sprengel deformity, midfacial hypoplasia                                                                                                                 | AML, 2 years                                                    | Died of AML age 3             | <i>Howlett et al</i><br><i>Ikdeda et al</i> |
| 1A      | M | 6174delT                | 9435T>A<br>[C3069X]       | Short, cafe´ -au-lait, pigmented, abnormal thumbs and radii, microcephaly, imperforate anus, epicanthal folds, micropenis, undescended testes, dislocated hips, hydronephrosis, abnormal hearing (VATER*) | Brain tumour<br>medulloblastoma or<br>astrocytoma,<br>4.9 years | Died of tumor age 5           | <i>Offit et al</i>                          |
| 1B      | M | 6174delT                | 9435T>A<br>[C3069X]       | Short, abnormal thumbs, microcephaly, imperforate anus with rectovaginal fistula, slanted eyes, anomalous kidneys, small ear, hip dysplasia (VATER*)                                                      | Astrocytoma 2<br>years,                                         | Died of tumour<br>age 2       | <i>Offit et al</i>                          |
| 2       | F | 6174delT                | 886delG                   | No detailed clinical features reported                                                                                                                                                                    | Medulloblastoma,<br>4.5 years                                   | No details reported           | <i>Offit et al</i>                          |
| 3       | F | 5301insA                | 7690T RC<br>[I2490T]      | No detailed clinical features reported                                                                                                                                                                    | Medulloblastoma<br>2.5 years                                    | No details reported           | <i>Offit et al</i>                          |
| 4       | F | 4150G>T<br>[E1308X]     | 9424C>T<br>[Q3066X]       | No detailed clinical features reported                                                                                                                                                                    | Medulloblastoma,<br>3.5 years                                   | No details reported           | <i>Offit et al</i>                          |
| K1S1    | M | 886delGT                | 8447T RA<br>[L2740X]      | Cafe´ au lait, microcephaly, Cardiac malformation                                                                                                                                                         | Medulloblastoma,<br>2.3 years                                   | Died of treatment<br>toxicity | <i>Hirsch et al</i>                         |

|                |                     |                              |                              |                                                                           |                                                          |                                                                             |                     |
|----------------|---------------------|------------------------------|------------------------------|---------------------------------------------------------------------------|----------------------------------------------------------|-----------------------------------------------------------------------------|---------------------|
| <b>K1S2</b>    | <b>M</b>            | <b>886delGT</b>              | <b>8447T RA<br/>[L2740X]</b> | Cafe´ au lait, abnormal facies, epicanthus (limited clinical description) | M Wilms' tumour, 1.3 years<br>Medulloblastoma, 4.3 years | Died of progressive medulloblastoma                                         | <b>Hirsch et al</b> |
| <b>K2S1</b>    | <b>M</b>            | <b>4876G RT<br/>[E1550X]</b> | <b>7757T RC<br/>[L2510P]</b> | Short, microcephaly (limited clinical description)                        | M Wilms' Tumour, 0.5 years,<br>AML, 2 years              | Died of refractory AML and toxicity age 2                                   | <b>Hirsch et al</b> |
| <b>K2S2</b>    | <b>F</b>            | <b>4876G RT<br/>[E1550X]</b> | <b>7757T RC<br/>[L2510P]</b> | Short, pigmented, bifid thumb, elfin facies, small palpebral fissures     | T-ALL, 4.9 years                                         | remission from T-Cell leukaemia age 5, no further outcome reported          | <b>Hirsch et al</b> |
| <b>129/1</b>   | <b>Not reported</b> | <b>IVS7+2T&gt;G</b>          | <b>IVS7+2T&gt;G</b>          | Short, IUGR, cafe´ au lait, microcephaly, imperforate anus                | AML, 2.2 years                                           | Died of refractory AML                                                      | <b>Wagner et al</b> |
| <b>357/1 A</b> | <b>Not reported</b> | <b>8106G RC<br/>[W2626C]</b> | <b>2041insA</b>              | Short, hypoplastic thumb, imperforate anus                                | AML, 1.9 years                                           | Died of refractory AML                                                      | <b>Wagner et al</b> |
| <b>632/1</b>   | <b>F</b>            | <b>IVS7+1G&gt;A</b>          | <b>5910C RG<br/>[Y1894X]</b> | Short, cafe´ au lait, dysplastic hips, pelvic kidney                      | AML, 3 years                                             | Died of refractory AML                                                      | <b>Wagner et al</b> |
| <b>632/2</b>   | <b>F</b>            | <b>IVS7+1G&gt;A</b>          | <b>5910C RG<br/>[Y1894X]</b> | Short, imperforate anus, hypoplastic thumb                                | AML, 21 months                                           | Refractory AML, alive 6 at 6 months follow up. No further outcome reported. | <b>Wagner et al</b> |
| <b>800/1</b>   | <b>M</b>            | <b>IVS7+2T &gt;G</b>         | <b>5164del4</b>              | IUGR, microcephaly, FTT, micropenis, cafe´ au lait spots                  | AML, 0.9 years                                           | Died of refractory AML                                                      | <b>Wagner et al</b> |
| <b>800/2</b>   | <b>M</b>            | <b>IVS7+2T &gt;G</b>         | <b>5164del4</b>              | IUGR, microcephaly, cafe´ au lait spots, FTT                              | Wilms' Tumour 0.8 years                                  | Alive 9 months follow up. No further FU reported                            | <b>Wagner et al</b> |
| <b>RB</b>      |                     | <b>886delTG</b>              | <b>5873C RA<br/>[S1882X]</b> | Short, pigmented, cafe´ au lait spots, microcephaly, cryptorchidism       | Wilms' Tumour 3.5 years,<br>glioblastoma                 | Died age 10 of brain tumour                                                 | <b>Reid et al</b>   |

|                 |           |                                 |                                        |                                                                                                                                                                                                                     |                                                                                 |                                                  |                     |
|-----------------|-----------|---------------------------------|----------------------------------------|---------------------------------------------------------------------------------------------------------------------------------------------------------------------------------------------------------------------|---------------------------------------------------------------------------------|--------------------------------------------------|---------------------|
|                 |           |                                 |                                        |                                                                                                                                                                                                                     | multiforme, 9 years                                                             |                                                  |                     |
| <b>CB</b>       |           | <b>886DelTG</b>                 | <b>5873C RA [S1882X]</b>               | café au lait spots (limited clinical description)                                                                                                                                                                   | Wilms' (0.6), Brain—medulloblastoma (6), B-ALL (10)                             | Died age 12 of progressive medulloblastoma       | <b>Reid et al</b>   |
| <b>SB1690CB</b> |           | <b>IVS7+2T&gt;G</b>             | <b>3827delGT</b>                       | Hypermobility thumb, microcephaly, imperforate anus, deafness, renal dysplasia, midfacial hypoplasia (VATER*)                                                                                                       | AML 2.1 years                                                                   | Died of progressive AML age 2                    | <b>Meyer et al</b>  |
| <b>NCI 1</b>    |           | <b>6174delT</b>                 | <b>9424C RT [Q3066X]</b>               | Short, café au lait, microcephaly, facial dysmorphism, abnormal thumbs, anterior anus, cloudy corneas, ectopic kidneys, delayed development, hydrocephaly (VATER*)                                                  | Medulloblastoma, 3.1 years                                                      | Not reported                                     | <b>Alter et al</b>  |
| <b>P5</b>       |           | <b>c.2860 A&gt;T</b>            | <b>c.7964 A&gt;G</b>                   | Dislocated hips, facial abnormalities, café au lait spots, growth retardation                                                                                                                                       | Medulloblastoma, 3.5 years                                                      | Died of progressive medulloblastoma age 5        | <b>Bodd et al</b>   |
| <b>PT2</b>      |           | <b>1548del4</b>                 | <b>1548del4</b>                        | Short, pigmented, café au lait, spots, adducted thumbs, microcephaly, sacral hemivertebra, ventricular septal defect, pelvic kidney, oesophageal atresia, micrognathia, CNS gyrations, congenital cataract (VATER*) | Nephroblastoma, Bilat. Neuroblastoma, Posterior fossa tumour before 1.5 years   | Died age 16 months                               | <b>Faivre et al</b> |
| <b>1703</b>     |           | <b>c.7878G&gt;C (p.W2626C)</b>  | <b>c.9097dupA p.T3033NfsX10</b>        | vertebral, anal, cardiac, tracheal, renal and limb anomalies with hydrocephalus. VACTERL-H                                                                                                                          | Hepatoblastoma, 4 years                                                         | Died of treatment complications age 4            | <b>Kopic et al</b>  |
| <b>Pt 1</b>     | <b>11</b> | <b>g.3492insT (c.3264dupT)</b>  | <b>g.8715p3A&gt;G (c.8487p3A&gt;G)</b> | Microcephaly; esotropia; cerebellar hypoplasia; arachnoid cyst; abnormal radii and thumbs; clinodactyly; FTT; café au lait spots                                                                                    | Bilateral Wilms' Tumour, 1 year myelodysplasia 2 years, medulloblastoma 2 years | <i>Died of progressive medulloblastoma age 3</i> | <b>Myers et al</b>  |
| <b>Pt 2</b>     | <b>15</b> | <b>g.2041insA (c.1813dupA),</b> | <b>g.859p2A&gt;G (c.631p2T&gt;G)</b>   | Intestinal duplication cysts/mesenteric lymphangioma jejunum; FTT; microcephaly; café au lait spots; ear anomalies; bilateral clinodactyly                                                                          | Neuroblastoma stage IIb, 17 months, AML 20 months                               | <i>Died of refractory AML</i>                    | <b>Myers et al</b>  |
| <b>Pt 3</b>     | <b>2</b>  | <b>g.3127delCT</b>              | <b>g.7235G&gt;C</b>                    | Holoprosencephaly; microcephaly; TEF; FTT; ear anomalies;                                                                                                                                                           | Differentiating                                                                 | <i>Died of refractory</i>                        | <b>Myers et al</b>  |

|                |  |                           |                       |                                                                                                               |                                                        |                                                                     |                            |
|----------------|--|---------------------------|-----------------------|---------------------------------------------------------------------------------------------------------------|--------------------------------------------------------|---------------------------------------------------------------------|----------------------------|
|                |  | <b>(c.2899-2900delCT)</b> | <b>(c.7007G&gt;A)</b> | sensineural hearing loss; pelvic kidneys; optic anomalies; polydactyly; cafe' au lait spots; congenital nevus | neuronal neoplasm<br>21 months , MDS/<br>AML 24 months | <i>AML</i>                                                          |                            |
| <b>ID12 S1</b> |  | <b>6174delT</b>           | <b>886delGT</b>       | No features reported                                                                                          | Medulloblastoma, 21 months                             | <i>Alive 23 moths from diagnosis, no further follow up reported</i> | <b><i>DeWire et al</i></b> |
| <b>ID12 S2</b> |  | <b>6174delT</b>           | <b>886delGT</b>       | No features reported                                                                                          | Medulloblastoma, 15 moths                              | <i>Died</i>                                                         | <b><i>DeWire et al</i></b> |
| <b>ID 13</b>   |  | <b>3492insT</b>           | <b>IVS19+3A&gt;G</b>  | No features reported                                                                                          | Medulloblastoma, 24 months                             | <i>Died</i>                                                         | <b><i>DeWire et al</i></b> |
